# Supplementary material
Source: Springer Nature journal article supplement (https://www.springermedizin.de/resource/supplementary/12955_2011_865_MOESM1_ESM.pdf/9561436)
Supplement: MOESM1 [file 9561436]

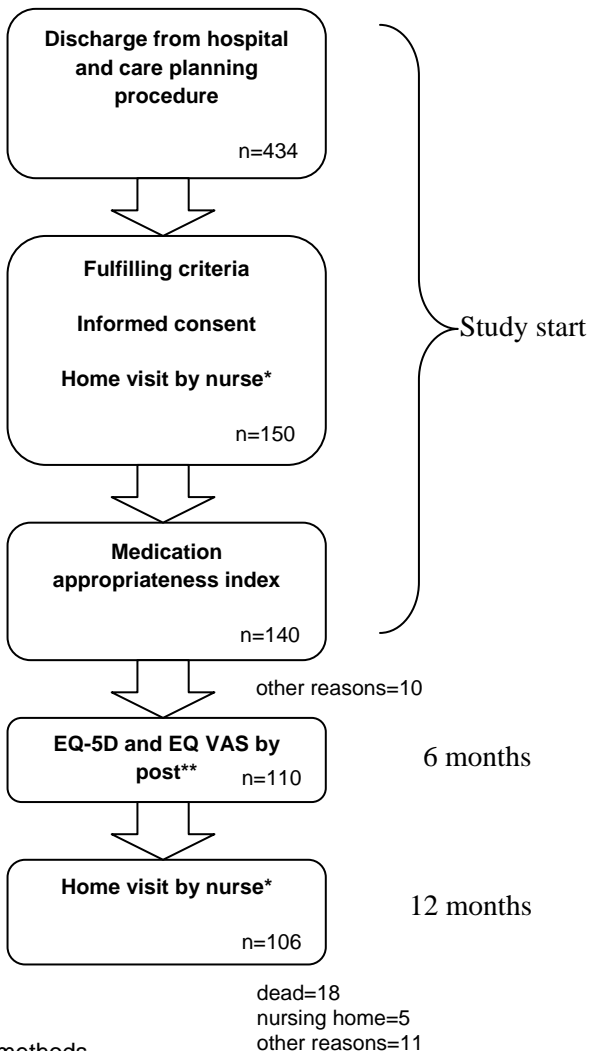

\* see methods

\*\* 79% response rate

Dropouts for other reasons include no answer after three telephone calls, not opening the door at agreed visiting time, medical record not attainable and no longer willing to participate.
